# Supplementary material
Source: PubMed Central journal article supplement (PMC6390645)
Supplement: Supp_Table1.pdf [file Supp_Table1.pdf]

## Supplementary Data

SUPPLEMENTARY TABLE S1. ADJUSTED ODDS RATIOS OF ACHIEVING OPTIMAL GLYCEMIC CONTROL BY QUARTILES OF VEGETABLE AND FRUIT-RELATED INDIVIDUAL HEALTHY EATING INDEX 2010 COMPONENT SCORES

| <i>Exposure</i>                               | <i>Outcome</i>                                   | <i>Quartile</i>         | <i>Adjusted OR (95% CI)<sup>a</sup></i> |
|-----------------------------------------------|--------------------------------------------------|-------------------------|-----------------------------------------|
| HEI total vegetable component score           | Overall glycemic control                         | 1 (REF)                 | 1                                       |
|                                               |                                                  | 2                       | <b>1.51 (1.07–2.11)</b>                 |
|                                               |                                                  | 3                       | 0.97 (0.66–1.44)                        |
|                                               |                                                  | 4                       | 1.36 (0.99–1.87)                        |
|                                               | Met goal fasting glucose <95 mg/dL               | 1 (REF)                 | 1                                       |
|                                               |                                                  | 2                       | 0.90 (0.58–1.37)                        |
|                                               |                                                  | 3                       | 0.69 (0.43–1.10)                        |
|                                               |                                                  | 4                       | 0.84 (0.56–1.25)                        |
|                                               | Met goal 1-hour postbreakfast glucose <140 mg/dL | 1 (REF)                 | 1                                       |
|                                               |                                                  | 2                       | 1.30 (0.84–2.01)                        |
|                                               |                                                  | 3                       | 1.00 (0.61–1.62)                        |
|                                               |                                                  | 4                       | <b>1.57 (1.04–2.39)</b>                 |
|                                               | Met goal 1-hour postlunch glucose <140 mg/dL     | 1 (REF)                 | 1                                       |
|                                               |                                                  | 2                       | <b>1.74 (1.18–2.56)</b>                 |
|                                               |                                                  | 3                       | 1.06 (0.70–1.61)                        |
|                                               |                                                  | 4                       | <b>1.83 (1.28–2.64)</b>                 |
| Met goal 1-hour postdinner glucose <140 mg/dL | 1 (REF)                                          | 1                       |                                         |
|                                               | 2                                                | <b>1.48 (1.01–2.16)</b> |                                         |
|                                               | 3                                                | 1.21 (0.79–1.86)        |                                         |
|                                               | 4                                                | <b>1.48 (1.04–2.11)</b> |                                         |
| HEI greens and beans component score          | Overall glycemic control                         | 1 (REF)                 | 1                                       |
|                                               |                                                  | 2                       | 1.12 (0.79–1.59)                        |
|                                               |                                                  | 3 <sup>b</sup>          | <b>1.45 (1.08–1.94)</b>                 |
|                                               | Met goal fasting glucose <95 mg/dL               | 1 (REF)                 | 1                                       |
|                                               |                                                  | 2                       | 0.77 (0.50–1.19)                        |
|                                               |                                                  | 3 <sup>b</sup>          | 0.85 (0.58–1.24)                        |
|                                               | Met goal 1-hour postbreakfast glucose <140 mg/dL | 1 (REF)                 | 1                                       |
|                                               |                                                  | 2                       | 1.16 (0.75–1.79)                        |
|                                               |                                                  | 3 <sup>b</sup>          | <b>1.75 (1.20–2.57)</b>                 |
|                                               | Met goal 1-hour postlunch glucose <140 mg/dL     | 1 (REF)                 | 1                                       |
|                                               |                                                  | 2                       | 1.23 (0.84–1.79)                        |
|                                               |                                                  | 3 <sup>b</sup>          | <b>1.87 (1.34–2.61)</b>                 |
| Met goal 1-hour postdinner glucose <140 mg/dL | 1 (REF)                                          | 1                       |                                         |
|                                               | 2                                                | 1.43 (0.97–2.10)        |                                         |
|                                               | 3 <sup>b</sup>                                   | <b>1.59 (1.15–2.21)</b> |                                         |
| HEI total fruit component score               | Overall glycemic control                         | 1 (REF)                 | 1                                       |
|                                               |                                                  | 2                       | 1.11 (0.79–1.56)                        |
|                                               |                                                  | 3                       | 1.54 (0.97–2.43)                        |
|                                               |                                                  | 4                       | 1.21 (0.89–1.64)                        |
|                                               | Met goal fasting glucose <95 mg/dL               | 1 (REF)                 | 1                                       |
|                                               |                                                  | 2                       | 1.16 (0.76–1.77)                        |
|                                               |                                                  | 3                       | 1.13 (0.62–2.04)                        |
|                                               |                                                  | 4                       | 0.89 (0.61–1.29)                        |
|                                               | Met goal 1-hour postbreakfast glucose <140 mg/dL | 1 (REF)                 | 1                                       |
|                                               |                                                  | 2                       | 1.09 (0.71–1.69)                        |
|                                               |                                                  | 3                       | 1.27 (0.69–2.33)                        |
|                                               |                                                  | 4                       | 1.30 (0.87–1.93)                        |
|                                               | Met goal 1-hour postlunch glucose <140 mg/dL     | 1 (REF)                 | 1                                       |
|                                               |                                                  | 2                       | 1.43 (0.97–2.10)                        |
|                                               |                                                  | 3                       | 1.28 (0.76–2.17)                        |
|                                               |                                                  | 4                       | 1.25 (0.88–1.76)                        |
|                                               | Met goal 1-hour postdinner glucose <140 mg/dL    | 1 (REF)                 | 1                                       |
|                                               |                                                  | 1                       | 1.21 (0.83–1.76)                        |
| 2                                             |                                                  | 1.41 (0.84–2.39)        |                                         |
|                                               |                                                  | 3                       | <b>1.51 (1.07–2.13)</b>                 |

*(continued)*

SUPPLEMENTARY TABLE S1. (CONTINUED)

| <i>Exposure</i>                               | <i>Outcome</i>                                   | <i>Quartile</i>  | <i>Adjusted OR (95% CI)<sup>a</sup></i> |
|-----------------------------------------------|--------------------------------------------------|------------------|-----------------------------------------|
| HEI whole fruit component score               | Overall glycemic control                         | 1 (REF)          | 1                                       |
|                                               |                                                  | 2                | 1.59 (0.85–2.97)                        |
|                                               |                                                  | 3 <sup>b</sup>   | 1.25 (0.94–1.65)                        |
|                                               | Met goal fasting glucose <95 mg/dL               | 1 (REF)          | 1                                       |
|                                               |                                                  | 2                | 1.03 (0.48–2.19)                        |
|                                               |                                                  | 3 <sup>b</sup>   | 0.96 (0.68–1.36)                        |
|                                               | Met goal 1-hour postbreakfast glucose <140 mg/dL | 1 (REF)          | 1                                       |
|                                               |                                                  | 2                | 1.94 (0.78–4.83)                        |
|                                               |                                                  | 3 <sup>b</sup>   | 1.37 (0.96–1.94)                        |
|                                               | Met goal 1-hour postlunch glucose <140 mg/dL     | 1 (REF)          | 1                                       |
|                                               |                                                  | 2                | 2.33 (1.00–5.47)                        |
|                                               |                                                  | 3 <sup>b</sup>   | 1.21 (0.88–1.66)                        |
| Met goal 1-hour postdinner glucose <140 mg/dL | 1 (REF)                                          | 1                |                                         |
|                                               | 2                                                | 1.34 (0.65–2.73) |                                         |
|                                               | 3 <sup>b</sup>                                   | 1.33 (0.97–1.81) |                                         |

<sup>a</sup>Adjusted for maternal age (years), race/ethnicity, physical activity (metabolic equivalent [MET]-minutes/week), prepregnancy BMI (kg/m<sup>2</sup>), and randomization condition.

<sup>b</sup>Due to the limited variation in these individual component scores, the quartiles 3 and 4 collapsed into one group. REF: reference category.

Bold indicates statistical significance at ( $\alpha < 0.05$ ).

BMI, body mass index; CI, confidence interval; HEI, Healthy Eating Index; OR, odds ratio.
